# Supplementary material for: Late Neogene terrestrial climate reconstruction of the central Namib Desert derived by the combination of U–Pb silcrete and terrestrial cosmogenic nuclide exposure dating
Source: Copernicus journal article supplement (doi:10.5194/gchron-5-433-2023), 2023-12-01
Supplement: Supplementary file 1 [file gchron-5-433-2023-supplement.zip]

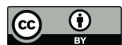

## *Supplement of*

# **Late Neogene terrestrial climate reconstruction of the central Namib Desert derived by the combination of U–Pb silcrete and terrestrial cosmogenic nuclide exposure dating**

**Benedikt Ritter et al.**

*Correspondence to:* Benedikt Ritter ([benedikt.ritter@uni-koeln.de](mailto:benedikt.ritter@uni-koeln.de)) and Richard Albert ([albertroper@em.uni-frankfurt.de](mailto:albertroper@em.uni-frankfurt.de))

- [gchron-5-433-2023-supplement-title-page.pdf](#)
- Supporting Information
  - [Figure S1\\_Compilation\\_Microscope\\_laserspots.pdf](#)
  - [Table SI1\\_TCN.xlsx](#)
  - [Table SI2\\_U-Pb.xlsb](#)

The copyright of individual parts of the supplement might differ from the article licence.
