# Supplementary material for: Late Neogene terrestrial climate reconstruction of the central Namib Desert derived by the combination of U–Pb silcrete and terrestrial cosmogenic nuclide exposure dating
Source: Copernicus journal article supplement (doi:10.5194/gchron-5-433-2023), 2023-12-01
Supplement: Supplementary file 1 [file Table SI1_TCN.xlsx]

## Sheet: Van der Wateren - Dunai 2001  
	Table 1 from Van der Wateren & Dunai 2001
	Site	Sample No.	Type of	Elevation	Longitude	Latitude	Laboratory	21Ne	21Ne Unc	21Ne Unc %	21Ne	21Ne Unc	Exposure Age	Unc. Exp. Age	Corr. Age	Unc. Corr Age	Denudation rate	Denudation rate Unc.	Remark
			Sample	[m]				[106 atom g-1]	[106 atom g-1]	%	[atom g-1]	[atom g-1]	[Ma]	[Ma]	[Ma]	[Ma]	[m/myr]	[m/myr]
1	Hope Mine	DWA98001	qz. Vein	555	S 23°32'07''	E 15°10'41''	VU Amsterdam	114	5	0.0438596	114000000	5000000	5.18	0.18			0.11	0.01
2	Hope Mine	DWA98002	qz. Vein	575	S 23°31'25''	E 15°12'35''	VU Amsterdam	87	7	0.0804598	87000000	7000000	3.97	0.25			0.15	0.01
3	Hope Mine	DWA98003	qz. Vein	608	S 23°30'29''	E 15°15'05''	VU Amsterdam	24	3	0.125	24000000	3000000	1.08	0.12			0.55	0.07
5	Hope Mine	DWA98005	qz. Vein	622	S 23°30'11''	E 15°15'47''	VU Amsterdam	12.5	1.2	0.096	12500000	1200000	0.57	0.04			1.04	0.01
6	Carp Cliff	DWA98006	ang. exp.	917	S 23°20'20''	E 15°44'40	VU Amsterdam	82.1	2.4	0.0292326	82100000	2400000	2.83	0.21			0.21	0.01
6	Carp Cliff	DWA98007	rnd. exp.	917	S 23°20'20''	E 15°44'40	VU Amsterdam	103	4	0.038835	103000000	4000000	3.54	0.1	3	0.25	0.17	0.01
7	Carp Cliff	DWA98008	rnd. sh.	912	S 23°19'52''	E 15°44'45''	VU Amsterdam	13.5	1.6	0.118519	13500000	1600000	0.46	0.06			1.4	0.2
19	Carp Cliff	DWA98021	rnd. sh.	912	S 23°19'54''	E 15°44'43''	VU Amsterdam	17.6	2.1	0.119318	17600000	2100000	0.62	0.06			1	0.1
12	Kamberg Cliff	DWA98013	ang. exp.	785	S 23°36'28''	E 15°34'49''	VU Amsterdam	73.2	2.8	0.0382514	73200000	2800000	2.8	0.09			0.22	0.01
13	Kamberg Cliff	DWA98014	rnd. sh.	779	S 23°36'28''	E 15°34'49''	VU Amsterdam	23.6	1.9	0.0805085	23600000	1900000	0.91	0.06			0.67	0.05
17	Gaub Bridge	DWA98019	r.c.s.	723	S 23°28'55''	E 15°45'40''	VU Amsterdam	11.4	1.1	0.0964912	11400000	1100000	0.44	0.04			1.4	0.1
22	Oswater	DWA98024	r.c.s.	428	S 23°38'02''	E 15°08'23''	VU Amsterdam	25.2	2.3	0.0912698	25200000	2300000	1.28	0.09			0.41	0.04
		Sample	Weight	Altitude	Production rate	°C Temp (min)	4He	4He Unc +/-1s	22/20Ne	Unc 22/20Ne	21/20Ne	Unc. 21/20Ne	20Ne	Unc. 20Ne	ex 21Ne	Unc ex 21Ne	21Ne age	Unc 21Ne age
		ID	[mg]	[m]	[atoms g-1 year -1]		[1010 atoms]	[1010 atoms]		+/- 1s		+/- 1s	[109 atoms /g]	[109 atoms /g]	[106 atoms/g]	[106 atoms/g]	[Ma]	[Ma]
		DWA98001	461	550	21.9	700 (15)	1.1	0.2	0.1036	0.0019	0.00553	0.00011	22.2	3	56.9	2.3	2.6	0.09
			461	550	21.9	1000 (15)	b.l.		0.1038	0.0019	0.005	9e-05	23.5	4	47.9	2.1	2.19	0.08
			461	550	21.9	1700 (15)	b.l.		0.1101	0.0042	0.00433	0.00014	6.7	1	9.2	0.6	0.42	0.02
		SUM					1.1	0.2							114	5	5.21	0.18
		DWA98002	685	550	22.2	700 (15)	4	0.8	0.1039	0.0015	0.00429	0.00022	34	5	45.3	3.8	2.04	0.14
			685	550	22.2	1000 (15)	b.l.		0.1049	0.0019	0.00549	0.00023	15	2	37.8	2.3	1.71	0.08
			685	550	22.2	1700 (15)	b.l.		0.1067	0.0032	0.00377	0.00038	5.2	1	4.2	0.6	0.19	0.02
		SUM					4	0.8							87.4	6.7	3.94	0.24
		DWA98003	501	550	22.8	700 (15)	n.d.		0.1023	0.0014	0.00332	5e-05	39	0.6	13.9	1.9	0.61	0.07
			501	550	22.8	1000 (15)	n.d.		0.1013	0.002	0.00341	6e-05	22.1	0.3	9.9	1.1	0.43	0.04
			501	550	22.8	1700 (15)	n.d.		0.1042	0.0049	0.00298	0.00012	4	0.1	0.1	0.2	0	0.01
		SUM													23.9	3.1	1.05	0.11
		DWA98005	650	550	23.1	700 (15)	n.d.		0.105	0.003	0.00364	0.00034	5.8	0.1	4	0.6	0.17	0.02
			650	550	23.1	1000 (15)	n.d.		0.1013	0.0054	0.00571	0.00021	3.2	0	8.7	0.5	0.38	0.02
			650	550	23.1	1700 (15)	n.d.		0.0962	0.0063	0.00288	0.00011	2.3	0	-0.2	0.1	-0.01	0
		SUM													12.5	1.2	0.54	0.04
		DWA98006	588	920	29.1	400 (30)	0.2	0.01	0.1047	0.0024	0.00312	7e-05	1.1	0	0.2	0	0.006	0.001
			588	920	29.1	800 (15)	34.3	0.3	0.1154	0.0011	0.01633	0.00027	5.8	0.1	77.4	2	2.67	0.06
			588	920	29.1	1700 (15)	9.3	0.1	1.022	0.0006	0.00363	7e-05	6.7	0.1	4.5	0.4	0.16	0.01
		SUM					43.8	0.4							82.1	2.4	2.83	0.21
		DWA98007	593	920	29.1	600 (20)	n.d.		0.1155	0.0015	0.01438	0.00027	7.3	0.1	83.7	2.3	2.89	0.006
			593	920	29.1	800 (15)	40.5	0.2	0.1018	0.0013	0.00434	8e-05	10	0.2	13.8	0.7	0.48	0.02
			593	920	29.1	1700 (15)	37	0.2	0.1032	0.0018	0.00356	8e-05	8.8	0.1	5.3	0.5	0.18	0.01
		SUM					77.5	0.4							102.8	3.5	3.54	0.1
		DWA98008	661	915	29.1	600 (15)	13.8	0.1	0.1011	0.0007	0.0043	7e-05	5.8	0.1	7.7	0.4	0.26	0.01	*
			661	915	29.1	800 (15)	131	1	0.1018	0.0007	0.00361	0.0001	13.5	0.2	8.7	0.8	0.3	0.02
			661	915	29.1	1700 (15)	119	1	0.1017	0.0006	0.00324	5e-05	16.9	0.3	4.8	0.8	0.16	0.02
		SUM					263	3							21.2	2	0.46	0.06
		DWA98013	794	785	26.2	600 (20)	16.3	0.2	0.1264	0.003	0.02001	0.00052	3.6	0.1	61.9	2	2.36	0.06
			794	785	26.2	800 (15)	21.5	0.2	0.1036	0.0017	0.00435	0.0001	5.7	0.1	7.9	0.4	0.3	0.01
			794	785	26.2	1700 (15)	20.4	0.2	0.1033	0.0025	0.00365	0.0001	5.7	0.1	3.6	0.3	0.14	0.01
		SUM					58.2	0.6							73.2	2.8	2.8	0.09
		DWA98014	775	780	26.2	600 (20)	30.7	0.3	0.1038	0.0014	0.00445	8e-05	9.2	0.1	13.7	0.7	0.53	0.02
			775	780	26.2	800 (15)	83.5	0.8	0.1013	0.001	0.00344	5e-05	14.2	0.2	6.9	0.7	0.26	0.02
			775	780	26.2	1700 (15)	69	0.7	0.1025	0.0016	0.00327	7e-05	9.8	0.1	3	0.5	0.12	0.01
		SUM					183	2							23.6	1.9	0.91	0.06
		DWA98019	388	723	24.9	600 (20)	7.8	0.1	0.1023	0.0007	0.00333	6e-05	7.5	0.1	2.8	0.4	0.107	0.012
			388	723	24.9	800 (15)	0.96	0.1	0.103	0.0006	0.00361	6e-05	7.7	0.1	5	0.4	0.191	0.014
			388	723	24.9	1700 (15)	0.32	0.1	0.1036	0.0007	0.00359	6e-05	5.8	0.1	3.6	0.3	0.14	0.01
		SUM					9.1	0.1							11.4	1.1	0.44	0.04
		DWA98021	794	915	29.1	600 (20)	43	0.5	0.1026	0.0007	0.00376	7e-05	9.9	0.1	7.9	0.6	0.28	0.02
			794	915	29.1	800 (15)	84.2	0.8	0.1011	0.0005	0.00329	5e-05	18.1	0.3	6	0.9	0.21	0.02
			794	915	29.1	1700 (15)	44.6	0.5	0.1033	0.0006	0.00323	6e-05	13.5	0.2	3.7	0.6	0.13	0.02
		SUM					172	2							17.6	2.1	0.62	0.6
		DWA98024	310	425	19.7	600 (25)	495	4	0.1017	0.0013	0.00356	8e-05	15	0.2	9	0.8	0.46	0.03
			310	425	19.7	800 (15)	291	3	0.1008	0.0012	0.00361	7e-05	17.9	0.3	11.6	1	0.59	0.04
			310	425	19.7	1700 (15)	105	1	0.1115	0.0045	0.00371	0.00016	6.2	0.1	4.6	0.5	0.23	0.02
		SUM					892	8							25.2	2.3	1.28	0.09
		Noble gas analysis results. Uncertainties of noble gas results are 1s and include the reproducibility of calibrations. The uncertainties are given in parentheses as last
		significant digits. For the calculation of ages, the excess 21Ne (i.e. the non-atmospheric 21Ne) of all steps was used, which plot within 2s on the cosmogenic production line (see
		Fig. 12). Only the first extraction step of sample DWA98008 (age marked with *) does not fall on the cosmogenic production line and this step was not included for the age
		calculation, all others sample steps fall on the cosmogenic production line. For all but one sample, geometric shielding was -0.5%, thus ignored. Sample DWA980019 was
		corrected for geometric shielding (4.2%). b.l. blank level.; n.d. not determined.

## Sheet: TCN Data This Study
	Ne Analysis Cologne (CGN)											Comparison VU Amsterdam vs CGN
	Sample	°C Temp (min)	22/20Ne	Unc 22/20Ne	21/20Ne	Unc. 21/20Ne	20Ne	Unc. 20Ne	ex 21Ne	Unc ex 21Ne				VU Amsterdam			CGN Etched		Diff. CGN etch
	ID			+/- 1s		+/- 1s	[atoms /g]	[atoms /g]	[atoms /g]	[atoms /g]			21Ne	21Ne Unc	21Ne Unc	21Ne	21Ne Unc	21Ne Unc	Amsterdam
	DWA98006Etch2	200W - 1200°C 15min	0.114801	0.00196739	0.0148589	0.000322866	6.04751e+09	7.54166e+07	7.19728e+07	1.8032e+06			[atoms/g]	[atoms/g]	%	[atoms/g]	[atoms/g]	%
	DWA98007Etch	200W - 1200°C 15min	0.10915	0.00211554	0.0100438	0.000139133	1.35416e+10	1.41271e+08	9.59576e+07	1.66469e+06		DWA98006	82100000	2400000	0.0292326	7.19728e+07	1.8032e+06	0.0250539	0.123352
	DWA98008Etch2	200W - 1200°C 15min	0.103238	0.000870597	0.00376651	0.000100282	1.90728e+10	3.02376e+08	1.54262e+07	478029		DWA98007	102800000	3500000	0.0340467	9.59576e+07	1.66469e+06	0.0173481	0.0665599
	DWA98021Etch	200W - 1200°C 15min	0.101943	0.00124803	0.00387046	7.38853e-05	1.67013e+10	2.31127e+08	1.52444e+07	359498		DWA98021	17600000	2100000	0.119318	1.52444e+07	359498	0.0235823	0.133843
	DWA98013Etch2	200W - 1200°C 15min	0.116207	0.00121331	0.0146	0.000204796	5.41382e+09	6.36518e+07	6.30291e+07	1.15368e+06		DWA98013	73200000	2800000	0.0382514	6.30291e+07	1.15368e+06	0.017448	0.138946
	DWA98014Etch	200W - 1200°C 15min	0.104298	0.00176899	0.0042498	6.64664e-05	1.50715e+10	1.42031e+08	1.94739e+07	355709		DWA98014	23600000	1900000	0.0805085	1.94739e+07	355709	0.0182659	0.174836
															+/- 1s			+/- 1s	0.127507
																			Correction Factor
	Cronus Earth Input Scheme
	Sample ID	Longitude	Latitude	Elevation	STD	Thickness	Density	Shielding	Erosionrate	Year Sampled		Sample ID	Isotope	Mineral	21Ne conc	21Ne Unc	Standard	STD Value
				[m]		[cm]	[g cm-3]								[atoms/g]	[atoms/g]
	DWA98006Etch2	-23.3389	15.7444	917	std	2	2.65	1	0	2001	;	DWA98006Etch2	Ne-21	quartz	7.19728e+07	1.8032e+06	CREU-1	348000000	;
	DWA98006VU	-23.3389	15.7444	917	std	2	2.65	1	0	2001	;	DWA98006VU	Ne-21	quartz	71427000	2088000	CREU-1	348000000	;
	DWA98007Etch	-23.3389	15.7444	917	std	2	2.65	1	0	2001	;	DWA98007Etch	Ne-21	quartz	9.59576e+07	1.66469e+06	CREU-1	348000000	;
	DWA98007VU	-23.3389	15.7444	917	std	2	2.65	1	0	2001	;	DWA98007VU	Ne-21	quartz	89610000	3480000	CREU-1	348000000	;
	DWA98008Etch2	-23.3311	15.7458	912	std	2	2.65	1	0	2001	;	DWA98008Etch2	Ne-21	quartz	1.54262e+07	478029	CREU-1	348000000	;
	DWA98008VU	-23.3311	15.7458	912	std	2	2.65	1	0	2001	;	DWA98008VU	Ne-21	quartz	11745000	1392000	CREU-1	348000000	;
	DWA98021Etch	-23.3317	15.7453	912	std	2	2.65	1	0	2001	;	DWA98021Etch	Ne-21	quartz	1.52444e+07	359498	CREU-1	348000000	;
	DWA98021VU	-23.3317	15.7453	912	std	2	2.65	1	0	2001	;	DWA98021VU	Ne-21	quartz	15312000	1827000	CREU-1	348000000	;
	DWA98013Etch2	-23.6078	15.5803	785	std	2	2.65	1	0	2001	;	DWA98013Etch2	Ne-21	quartz	6.30291e+07	1.15368e+06	CREU-1	348000000	;
	DWA98013VU	-23.6078	15.5803	785	std	2	2.65	1	0	2001	;	DWA98013VU	Ne-21	quartz	63684000	2436000	CREU-1	348000000	;
	DWA98014Etch	-23.6078	15.5803	779	std	2	2.65	1	0	2001	;	DWA98014Etch	Ne-21	quartz	1.94739e+07	355709	CREU-1	348000000	;
	DWA98014VU	-23.6078	15.5803	779	std	2	2.65	1	0	2001	;	DWA98014VU	Ne-21	quartz	20532000	1653000	CREU-1	348000000	;
	DWA98001VU	-23.5353	15.1781	555	std	2	2.65	1	0	2001	;	DWA98001VU	Ne-21	quartz	99180000	4350000	CREU-1	348000000	;
	DWA98002VU	-23.5236	15.2097	575	std	2	2.65	1	0	2001	;	DWA98002VU	Ne-21	quartz	75690000	6090000	CREU-1	348000000	;
	DWA98003VU	-23.5081	15.2514	608	std	2	2.65	1	0	2001	;	DWA98003VU	Ne-21	quartz	20880000	2610000	CREU-1	348000000	;
	DWA98005VU	-23.5031	15.263	622	std	2	2.65	1	0	2001	;	DWA98005VU	Ne-21	quartz	10875000	1044000	CREU-1	348000000	;
	DWA98019VU	-23.4819	15.7611	723	std	2	2.65	1	0	2001	;	DWA98019VU	Ne-21	quartz	9918000	957000	CREU-1	348000000	;
	DWA98024VU	-23.6339	15.1398	428	std	2	2.65	1	0	2001	;	DWA98024VU	Ne-21	quartz	21924000	2001000	CREU-1	348000000	;
