# Supplementary material for: Late Neogene terrestrial climate reconstruction of the central Namib Desert derived by the combination of U–Pb silcrete and terrestrial cosmogenic nuclide exposure dating
Source: Copernicus journal article supplement (doi:10.5194/gchron-5-433-2023), 2023-12-01

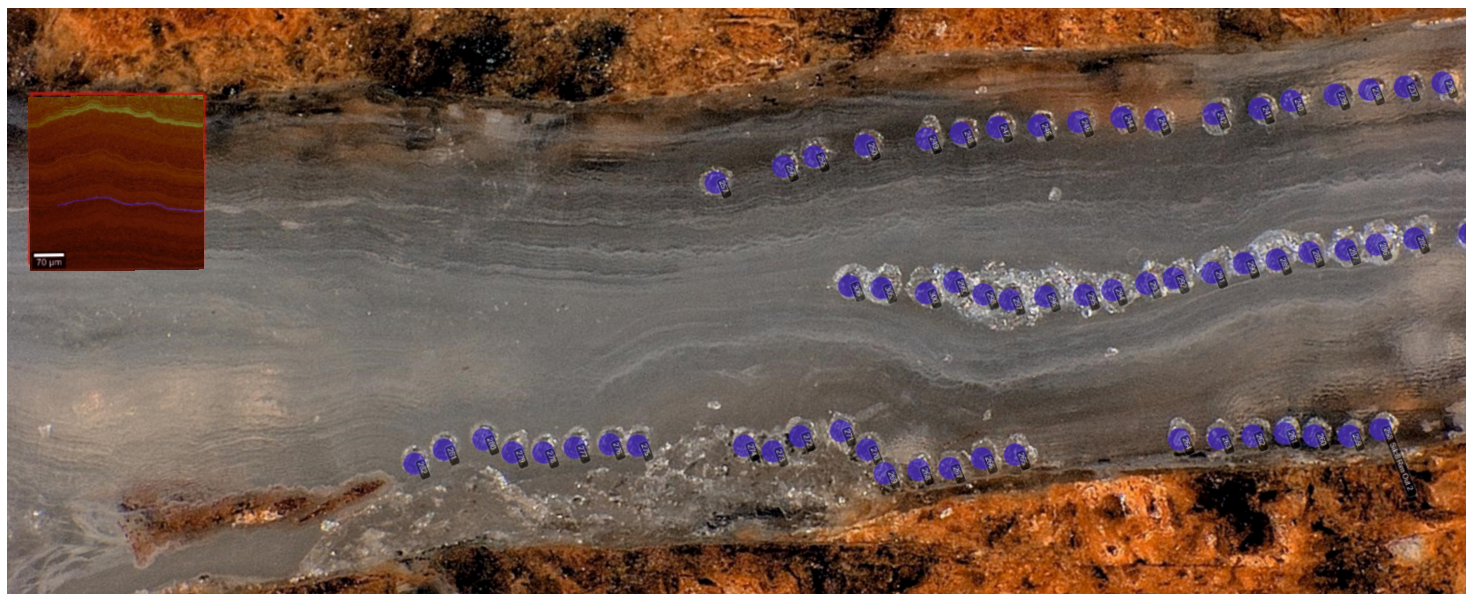

Digital microscope image of Silc 8 sample (*DWA98008*) with *spot locations* and *Raman map*.

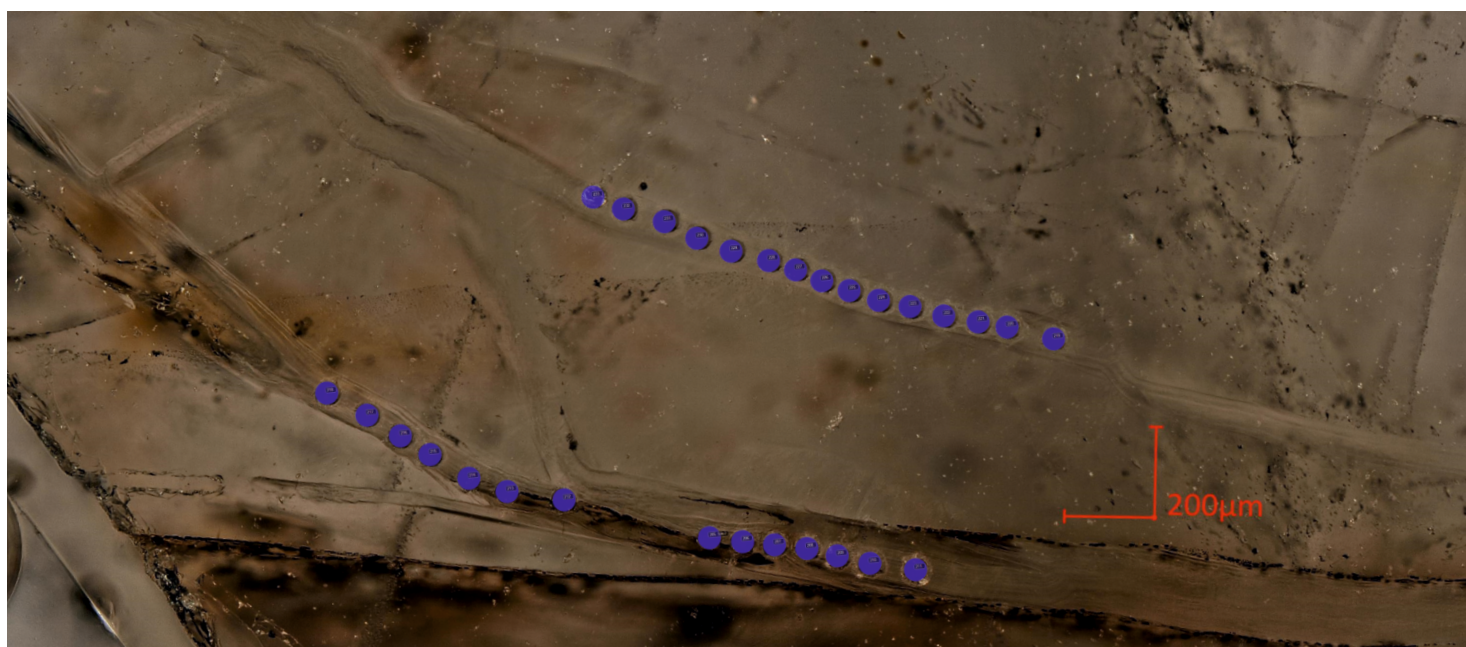

Digital microscope image of Silc 7 sample with *spot locations*.

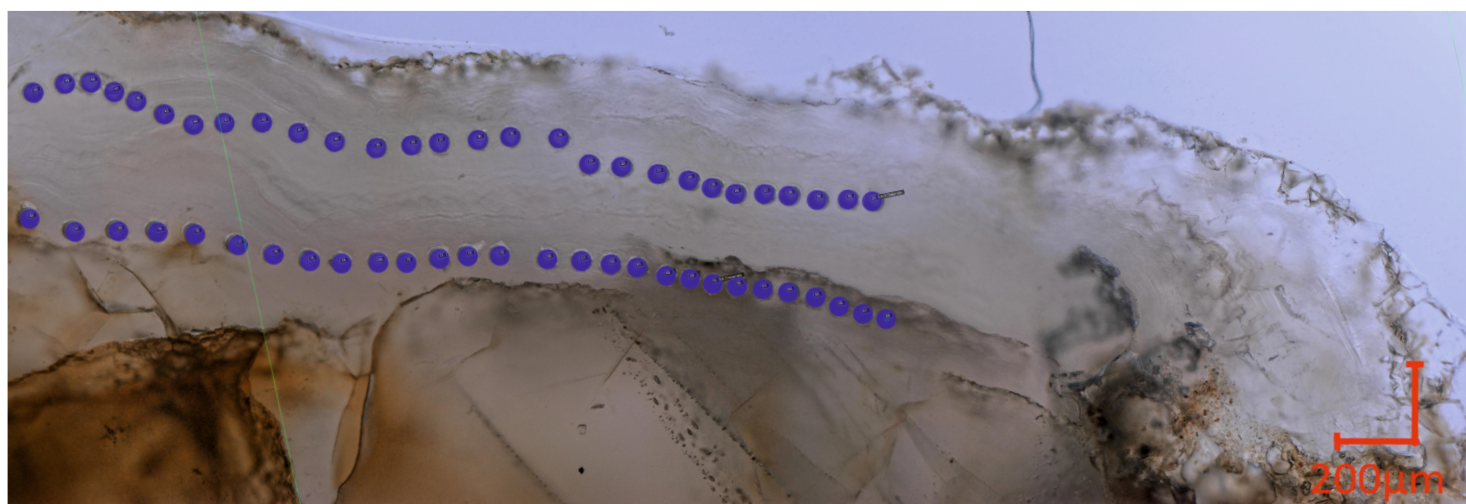

Digital microscope image of Silc 3 sample with *spot locations*.

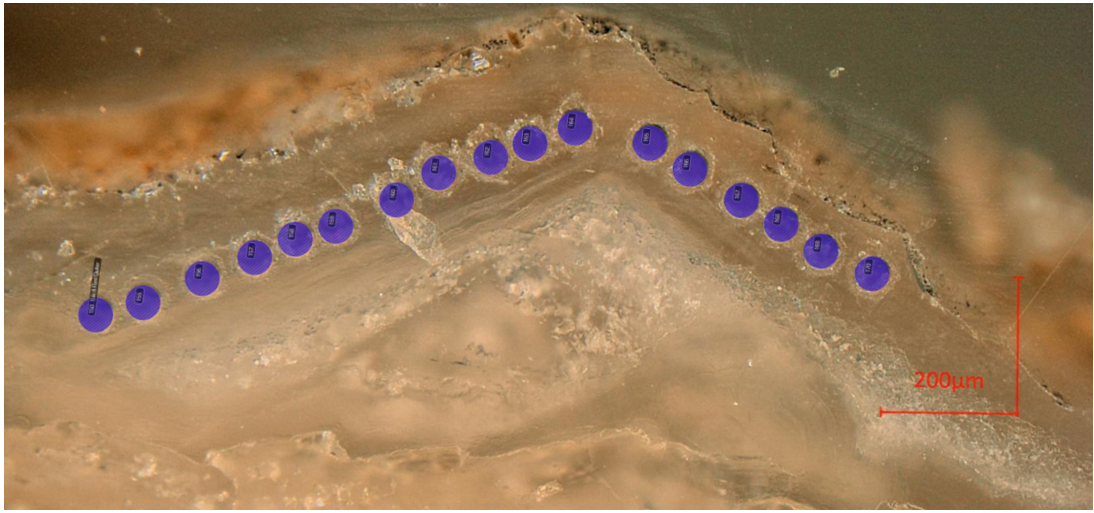

Several detailed digital microscope images of Silc 4 sample *with spot locations.*

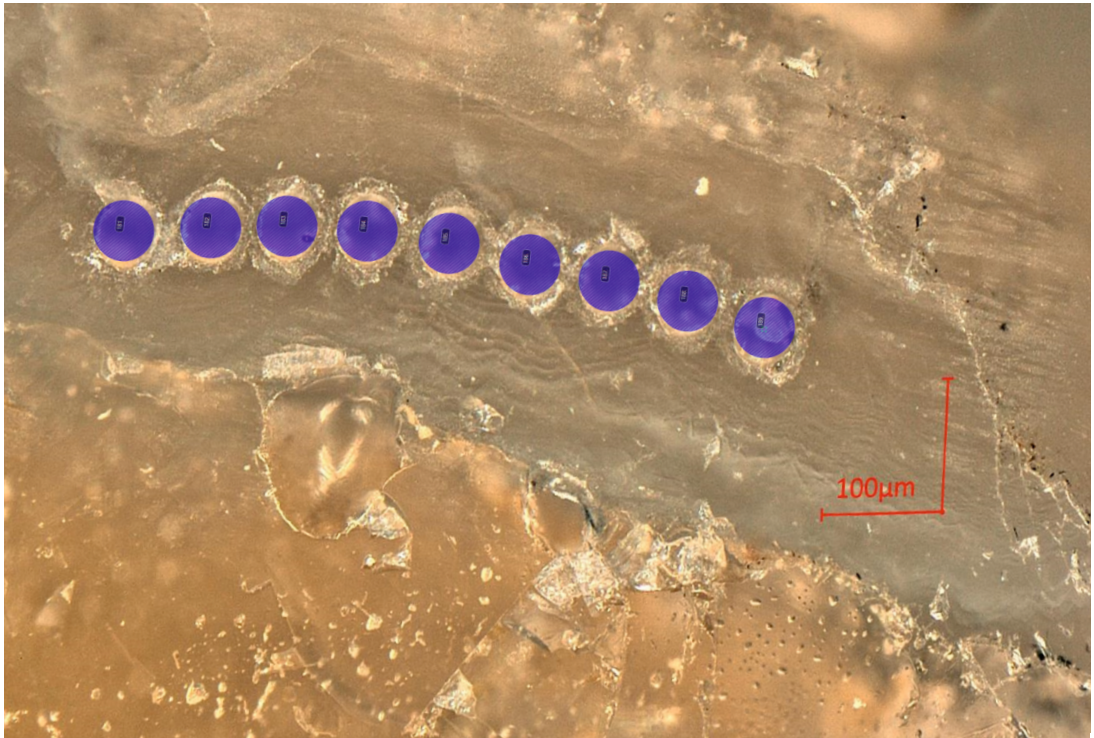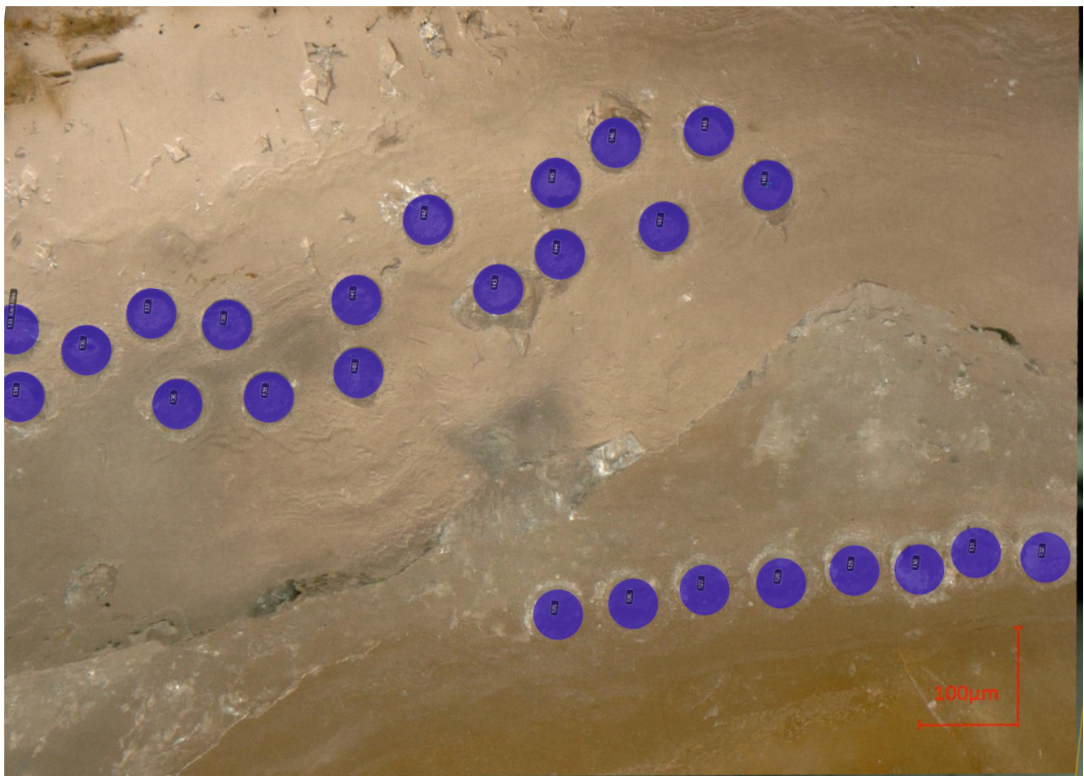

Supplement: Supplementary file 2 [file gchron-5-433-2023-supplement.zip]
